# Supplementary material for: Comparative study of the therapeutic potential of C 24 , C 32 , B 12 N 12 , and B 16 N 16 nanocages as drug delivery carriers for delivering an erlotinib derivative: DFT and QTAIM investigations
Source: Royal Society of Chemistry journal article supplement (doi:10.1039/d4nr05393a), 2025-01-01
Supplement: d4nr05393a1.pdf [file d4nr05393a1.pdf]

# Comparative Study of the Therapeutic Potential of C<sub>24</sub>, C<sub>32</sub>, B<sub>12</sub>N<sub>12</sub>, and B<sub>16</sub>N<sub>16</sub> Nanocages as Drug Delivery Carriers for Delivering an Erlotinib Derivative: DFT and QTAIM investigations

Khourshid Mehdizadeh<sup>1</sup>, Sourour PourFalatoon<sup>2</sup>, Milad Nouraliei<sup>3</sup> Majid Farsadrooh<sup>4\*</sup>, Hanseung Kim<sup>5</sup>, Marzieh Ramezani Farani<sup>5</sup>, Yun Suk Huh<sup>5,\*</sup>

<sup>1</sup>Department of Chemistry, Roudsar and Amlash Branch, Islamic Azad University, Roudsar, Iran

<sup>2</sup>Department of Chemistry, Science and Research Branch, Islamic Azad University, Tehran, Iran

<sup>3</sup>Department of Chemistry, Islamic Azad University, Central Tehran Branch, Tehran, Iran

<sup>4</sup>Renewable Energies Research Laboratory, Department of Chemistry, Faculty of Science, University of Sistan and Baluchestan, P.O. Box 98135 674, Zahedan, Iran

<sup>5</sup>NanoBio High-Tech Materials Research Center, Department of Biological Sciences and Bioengineering, Inha University, Incheon 22212, Republic of Korea

## \*Corresponding authors:

**Majid Farsadrooh**, *Renewable Energies Research Laboratory, Department of Chemistry, Faculty of Science, University of Sistan and Baluchestan, P.O. Box 98135 674, Zahedan, Iran*

**Tel.:** +989111369044

**Email:** [farsadroohmajid@gmail.com](mailto:farsadroohmajid@gmail.com)

**Marzieh Ramezani Farani**, *Department of Biological Engineering, Inha University, Incheon 22212, Republic of Korea*

**Tel.:** +82-10-9609-1367

**Email:** [farani.marzi@inha.ac.kr](mailto:farani.marzi@inha.ac.kr)

**Yun Suk Huh**, *Department of Biological Engineering, Inha University, Incheon 22212, Republic of Korea*

**Tel.:** +82-10-9633-6377

**Email:** [yunsuk.huh@inha.ac.kr](mailto:yunsuk.huh@inha.ac.kr)

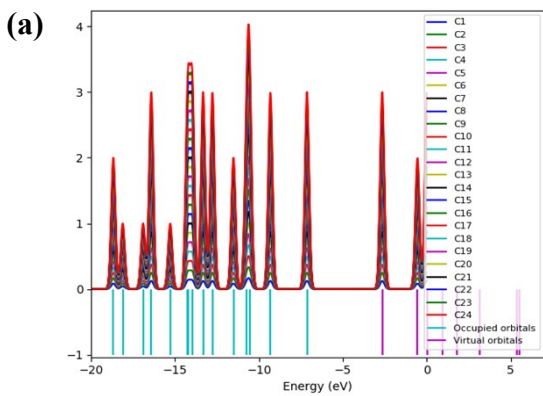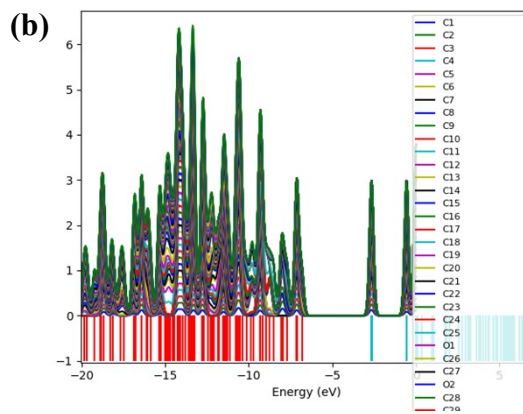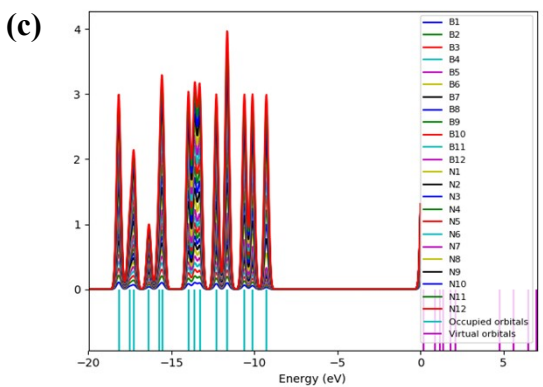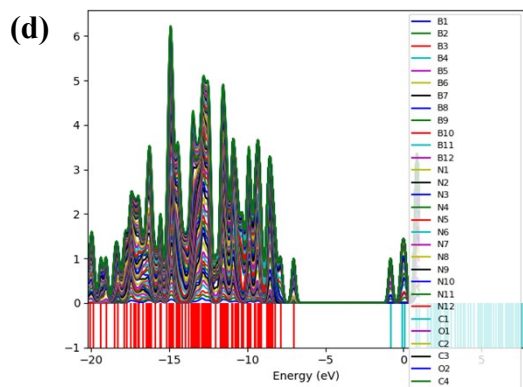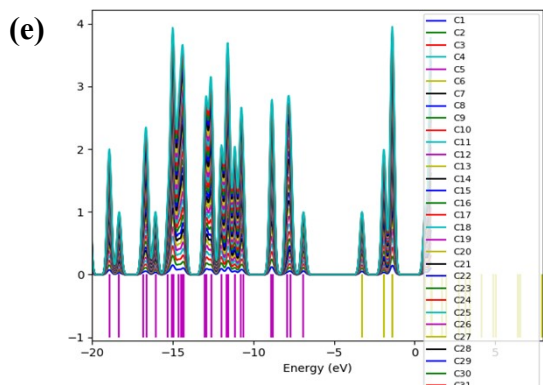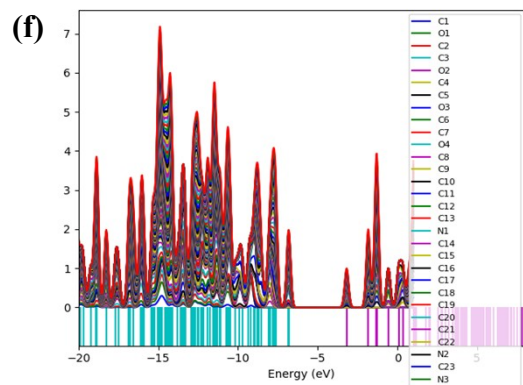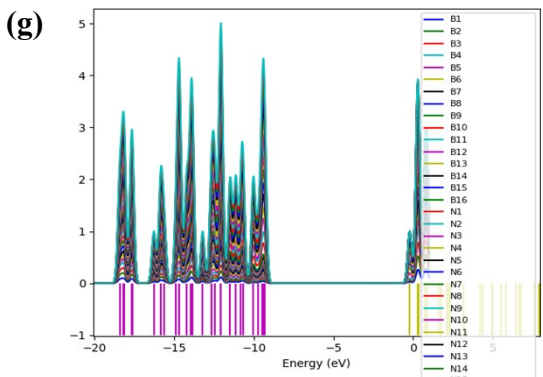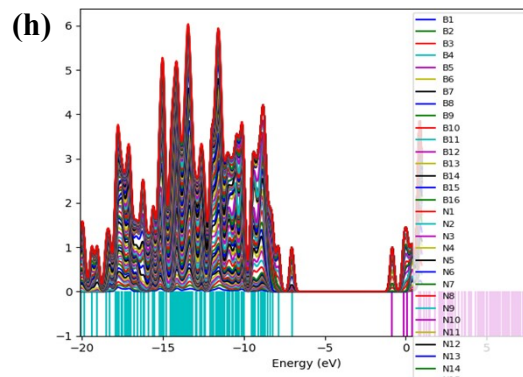

Fig. S1. PDOS plot shows the atoms involved in the intermolecular interactions of the energetically favorable methylerlotinib on C<sub>24</sub> nanocage, (b) methylerlotinib@C<sub>24</sub>-nanocage, (c) B<sub>12</sub>N<sub>12</sub>-nanocage, (d) methylerlotinib@B<sub>12</sub>N<sub>12</sub>-nanocage, (e) C<sub>32</sub>-nanocage, (f) methylerlotinib@C<sub>32</sub>-nanocage, (g) B<sub>16</sub>N<sub>16</sub>-nanocage, and (h) methylerlotinib@B<sub>16</sub>N<sub>16</sub>-nanocage.
